# Supplementary material
Source: publisher figshare collection journal article supplement (https://wiley.figshare.com/articles/dataset/_/3569109)
Supplement: Supplementary file 1 [file 1]

Peter A. Abrams and Michael H. Cortez. 2015. The many potential indirect interactions between predators that share competing prey. Ecological Monographs VOL: pp-pp.

## Appendix B Locations and stabilities of the equilibrium points

Let  $P_{R_1R_2}$  denote the coexistence equilibrium of the subsystem where only  $R_1$  and  $R_2$  are present (assuming it exists). Let  $P_{R_iN_j}$  denote the coexistence equilibrium of the subsystem where only  $R_i$  and  $N_j$  are present. Let  $P_{3,N_j}$  denote the coexistence equilibrium of the subsystem where only  $R_1$ ,  $R_2$  and  $N_j$  are present (assuming it exists). Let  $P_4$  denote the coexistence equilibrium where the densities of all four species are positive. We refer to  $P_{R_1R_2}$ ,  $P_{R_iN_j}$ , and  $P_{3,N_j}$  as boundary equilibria. In the following, we denote the entries of the two-species equilibria using overbars (e.g.,  $\bar{R}_1$ ), the entries of the three-species equilibria using hats (e.g.,  $\hat{R}_1$ ), and the entries of the four species equilibria using asterisks (e.g.,  $R_1^*$ ).

### Appendix B.1 Definition and stability of the two-species equilibria

There are five two-species equilibria. To be biologically relevant the equilibrium densities of both species must be positive. The boundary equilibrium where  $R_1$  and  $R_2$  coexist is

$$P_{R_1R_2} = \{\bar{R}_1, \bar{R}_2\} = \left\{ \frac{1}{1 - \alpha^2} \left( \frac{r_1}{k_1} - \frac{r_2\alpha q}{k_2} \right), \frac{1}{1 - \alpha^2} \left( \frac{r_2}{k_2} - \frac{r_1\alpha/q}{k_1} \right) \right\}. \quad (\text{B1})$$

This equilibrium can be invaded by  $N_j$  if  $0 < b_{j1}c_{j1}\bar{R}_1 + b_{j2}c_{j2}\bar{R}_2 - d_j$  where  $\bar{R}_i$  is the equilibrium density of  $R_i$  at  $P_{R_1R_2}$ .

The four remaining two-species equilibria each involve one predator species and one prey species. The boundary equilibrium where  $R_i$  and  $N_j$  coexist is

$$P_{R_iN_j} = \{\bar{R}_i, \bar{N}_j\} = \left\{ \frac{d_j}{b_{ji}c_{ji}}, \frac{r_i}{c_{ji}} \left[ 1 - \frac{d_j k_i}{b_{ji}c_{ji}r_i} \right] \right\}. \quad (\text{B2})$$

Table B1: Stability conditions for two-species boundary equilibria

| Eq.           | Stability Condition<br>(prey invasion)<br>(predator invasion)                                                                                                                                     | Resource Partitioning      |                            |
|---------------|---------------------------------------------------------------------------------------------------------------------------------------------------------------------------------------------------|----------------------------|----------------------------|
|               |                                                                                                                                                                                                   | $\Delta, \bar{\Delta} > 0$ | $\bar{\Delta}, \Delta < 0$ |
| $P_{R_1 N_1}$ | $r_2 \left( 1 - \frac{d_1 k_2}{b_{11} c_{11} r_2} \alpha / q \right) - \frac{c_{12} r_1}{c_{11}} \left( 1 - \frac{d_1 k_1}{b_{11} c_{11} r_1} \right)$<br>$b_{21} c_{21} d_1 - b_{11} c_{11} d_2$ | $\pm$<br>+                 | $+$<br>$-$                 |
| $P_{R_2 N_1}$ | $r_1 \left( 1 - \frac{d_1 k_1}{b_{12} c_{12} r_1} \alpha q \right) - \frac{c_{11} r_2}{c_{12}} \left( 1 - \frac{d_1 k_2}{b_{12} c_{12} r_2} \right)$<br>$b_{22} c_{22} d_1 - b_{12} c_{12} d_2$   | $+$<br>$-$                 | $\pm$<br>$+$               |
| $P_{R_2 N_2}$ | $r_1 \left( 1 - \frac{d_2 k_1}{b_{22} c_{22} r_1} \alpha q \right) - \frac{c_{21} r_2}{c_{22}} \left( 1 - \frac{d_2 k_2}{b_{22} c_{22} r_2} \right)$<br>$b_{12} c_{12} d_2 - b_{22} c_{22} d_1$   | $\pm$<br>$+$               | $+$<br>$-$                 |
| $P_{R_1 N_2}$ | $r_2 \left( 1 - \frac{d_2 k_2}{b_{21} c_{21} r_2} \alpha / q \right) - \frac{c_{22} r_1}{c_{21}} \left( 1 - \frac{d_2 k_1}{b_{21} c_{21} r_1} \right)$<br>$b_{11} c_{11} d_2 - b_{21} c_{21} d_1$ | $+$<br>$-$                 | $\pm$<br>$+$               |

Legend: + can invade, - cannot invade, and  $\pm$  invasion depends on parameters

Let  $N_k$  and  $R_h$  denote the two species not present at  $P_{R_i N_j}$ .  $N_k$  can invade if

$$b_{ki} c_{ki} d_j - b_{ji} c_{ji} d_k > 0. \quad (\text{B3})$$

$R_h$  can invade if

$$r_h \left( 1 - \frac{d_j k_h}{b_{ji} c_{ji} r_h} \alpha_{hi} \right) - \frac{c_{jh} r_i}{c_{ji}} \left( 1 - \frac{d_j k_i}{b_{ji} c_{ji} r_i} \right) > 0. \quad (\text{B4})$$

The stabilities of the four 1-predator,1-prey equilibria are shown in Table B1. Note that the stabilities depend on the signs of  $\Delta$  and  $\bar{\Delta}$ . In Table B1, + implies invasion by that species is possible, - implies invasion is not possible by that species, and  $\pm$  implies either outcome is possible.

Note that if both of the above two inequalities are reversed for a particular the 1-predator,1-prey equilibrium, then that equilibrium cannot be invaded. It is possible to choose parameter values such that there are two uninvasible 1-predator,1-prey equilibria. This occurs in two cases: (i) all invasion conditions for  $P_{R_1 N_1}$  and  $P_{R_2 N_2}$  are negative or (ii) all invasion conditions for  $P_{R_1 N_2}$  and  $P_{R_2 N_1}$  are negative. In both cases the system exhibits bistability and four-species coexistence is not possible.

## Appendix B.2 Definition and stability of the three-species equilibria

There are two three-species equilibria. The equilibrium where  $R_1$ ,  $R_2$  and  $N_j$  coexist is

$$P_{3,N_j} = \{\hat{R}_1, \hat{R}_2, \hat{N}_j\} = \left\{ \frac{c_{j2}(r_1 b_{j2} c_{j2} - d_j k_1 \alpha q) - c_{j1}(r_2 b_{j2} c_{j2} - d_j k_2)}{c_{j1} k_2 (b_{j1} c_{j1} - b_{j2} c_{j2} \alpha / q) + c_{j2} k_1 (b_{j2} c_{j2} - b_{j1} c_{j1} \alpha q)}, \right. \\ \left. \frac{c_{j1}(r_2 b_{j1} c_{j1} - d_j k_2 \alpha / q) - c_{j2}(r_1 b_{j1} c_{j1} - d_j k_1)}{c_{j1} k_2 (b_{j1} c_{j1} - b_{j2} c_{j2} \alpha / q) + c_{j2} k_1 (b_{j2} c_{j2} - b_{j1} c_{j1} \alpha q)}, \right. \\ \left. \frac{r_2 k_1 (b_{j2} c_{j2} - b_{j1} c_{j1} \alpha q) + r_1 k_2 (b_{j1} c_{j1} - b_{j2} c_{j2} \alpha / q) - k_1 k_2 d_j (1 - \alpha^2)}{c_{j1} k_2 (b_{j1} c_{j1} - b_{j2} c_{j2} \alpha / q) + c_{j2} k_1 (b_{j2} c_{j2} - b_{j1} c_{j1} \alpha q)} \right\}. \quad (\text{B5})$$

We denote the denominator of the entries of  $P_{3,N_j}$  by  $\sigma_j = c_{j1} k_2 (b_{j1} c_{j1} - b_{j2} c_{j2} \alpha / q) + c_{j2} k_1 (b_{j2} c_{j2} - b_{j1} c_{j1} \alpha q)$ . As shown in appendix D, stable coexistence of all three species occurs when  $\sigma_j > 0$  and  $\alpha < 1$ . If  $\sigma_j < 0$ , then stable coexistence is not possible because  $P_{3,N_j}$  is a saddle with one eigenvalue with positive real part.  $P_{3,N_j}$  can be invaded by the predator not present at equilibrium,  $N_k$ , if

$$b_{k1} c_{k1} \hat{R}_1 + b_{k2} c_{k2} \hat{R}_2 - d_k > 0. \quad (\text{B6})$$

## Appendix B.3 Definition and stability of the four-species equilibrium

The four-species coexistence equilibrium is

$$P_4 = \{R_1^*, R_2^*, N_1^*, N_2^*\} = \left\{ \frac{b_{12} c_{12} d_2 - b_{22} c_{22} d_1}{\bar{\Delta}}, \frac{b_{21} c_{21} d_1 - b_{11} c_{11} d_2}{\bar{\Delta}}, \right. \\ \left. \frac{r_2 c_{21} - r_1 c_{22}}{\Delta} + \frac{c_{22} k_1 - c_{21} k_2 \alpha / q}{\Delta} R_1^* - \frac{c_{21} k_2 - c_{22} k_1 \alpha q}{\Delta} R_2^*, \right. \\ \left. \frac{r_1 c_{12} - r_2 c_{11}}{\Delta} + \frac{c_{11} k_2 - c_{12} k_1 \alpha q}{\Delta} R_2^* - \frac{c_{12} k_1 - c_{11} k_2 \alpha / q}{\Delta} R_1^* \right\}.$$

Each  $N_j$  entry of  $P_4$  is positive if (1) the other three species can coexist (i.e.,  $P_{3,N_k}$  has positive entries and  $\sigma_k > 0$ ) and the three-species subsystem can be invaded by  $N_j$  or (2)  $N_j$  can invade one of the two-species equilibria at which it is absent, e.g.,  $N_1$  can invade  $P_{R_1,N_2}$  or  $P_{R_2,N_2}$ . The proof of this statement follows.

**Theorem 1.** Assume  $\Delta$  and  $\bar{\Delta}$  have the same sign.

(i) If  $P_{3,N_2}$  has positive entries,  $\sigma_2 > 0$ , and  $N_1$  can invade  $P_{3,N_2}$ , then the  $N_1$  entry of  $P_4$  is positive. Similarly, if  $P_{3,N_1}$  has positive entries,  $\sigma_1 > 0$ , and  $N_2$  can invade  $P_{3,N_1}$ , then the  $N_2$  entry of  $P_4$  is positive.

(ii) Assume  $P_{R_i N_j}$  has positive entries for all  $i$  and  $j$ . All entries of  $P_4$  are positive only if  $N_1$  can invade  $P_{R_i N_2}$  and  $N_2$  can invade  $P_{R_h N_1}$  for  $i \neq h$ .

*Proof.* Proof of (i): We will prove the statement for the  $N_1$  entry. The proof for the  $N_2$  entry is nearly identical. Denote the condition for  $N_1$  to invade  $P_{3,N_2}$ , i.e., the left hand side of equation (B6), by  $C_1$ . Note that  $C_1 = N_2^* \Delta \bar{\Delta} \sigma_2$  where  $N_2^*$  is the equilibrium density of  $N_2$  at  $P_4$ . Since we assume  $\Delta$  and  $\bar{\Delta}$  have the same sign,  $\sigma_2 > 0$ , and  $P_{3,N_2}$  has positive entries,  $C_1$  and  $N_2$  have the same sign. Hence, invasion ( $C_1 > 0$ ) implies  $N_2^* > 0$ .

Proof of (ii) We will prove the result by way of a proof by contradiction. Via Table B1, we have that if  $N_1$  can invade  $P_{R_2 N_2}$  then  $N_2$  cannot invade  $P_{R_2 N_1}$ . Similarly, if  $N_1$  can invade  $P_{R_1 N_2}$  then  $N_2$  cannot invade  $P_{R_1 N_1}$ . Assume the entries of  $P_4$  are positive and  $N_1$  can invade both  $P_{R_1 N_2}$  and  $P_{R_2 N_2}$ . This implies that  $A_1 = (b_{12}c_{12}d_2 - d_1b_{22}c_{22}) > 0$  and  $A_2 = (b_{11}c_{11}d_2 - b_{21}c_{21}d_1) > 0$ . Because  $R_1^* = A_1/\bar{\Delta}$  and  $R_2^* = -A_2/\bar{\Delta}$ , it must be the case that either  $R_1^*$  or  $R_2^*$  is negative, which contradicts our assumption that  $P_4$  has positive entries. Via an identical argument, if  $N_1$  can invade both  $P_{R_1 N_2}$  and  $P_{R_2 N_2}$ , then either  $R_1^*$  or  $R_2^*$  is negative.  $\square$

**Equilibrium Stability:** We now present some limited results about the stability of  $P_4$ . Figure 4 of the main text shows the locations of the Hopf bifurcation curves for the numerical examples in Figures 1 and 2. Our two main findings are that (1) four-species coexistence is not possible if  $\Delta$  and  $\bar{\Delta}$  have opposite signs and (2) cycles are more likely to occur when interspecific prey competition is sufficiently high ( $\alpha$  close to one) and asymmetric ( $q \neq 1$ ). We also show that stable coexistence is guaranteed when  $b_{11}/b_{21} = b_{12}/b_{22}$  and  $\alpha$  is sufficiently small.

The Jacobian evaluated at  $P_4$  is

$$J|_{P_4} = \begin{pmatrix} -R_1^*k_1 & -R_1^*k_1\alpha q & -c_{11}R_1^* & -c_{21}R_1^* \\ -R_2^*k_2\alpha/q & -R_2^*k_2 & -c_{12}R_2^* & -c_{22}R_2^* \\ b_{11}c_{11}N_1^* & b_{12}c_{12}N_1^* & 0 & 0 \\ b_{21}c_{21}N_2^* & b_{22}c_{22}N_2^* & 0 & 0 \end{pmatrix}. \quad (\text{B7})$$

The determinant of the Jacobian is  $N_1^*N_2^*R_1^*R_2^*\Delta\bar{\Delta}$ . Stable or cyclic coexistence of all species only occurs in our Lotka-Volterra model when the determinant of the Jacobian is positive. Consequently, coexistence is not possible if  $\Delta$  and  $\bar{\Delta}$  have opposite signs. When  $\Delta$  and  $\bar{\Delta}$  have the same sign, stable or cyclic coexistence are possible.

The characteristic polynomial for the Jacobian is

$$p(\lambda) = \lambda^4 + a_1\lambda^3 + a_2\lambda^2 + a_3\lambda + a_4 \quad (\text{B8})$$

where

$$\begin{aligned} a_1 &= k_1R_1^* + k_2R_2^* \\ a_2 &= R_1^*R_2^*k_1k_2(1 - \alpha^2) + N_1^*R_1^*b_{11}c_{11}^2 + N_1^*R_2^*b_{12}c_{12}^2 + N_2^*R_1^*b_{21}c_{21}^2 + N_2^*R_2^*b_{22}c_{22}^2 \\ a_3 &= -R_1^*R_2^*\alpha(k_1q + k_2/q)(N_1^*b_{11}c_{11}c_{12} + N_2^*b_{21}c_{21}c_{22}) \\ &\quad + R_1^*R_2^*(N_1^*k_2b_{11}c_{11}^2 + N_1^*k_1b_{12}c_{12}^2 + N_2^*k_1b_{22}c_{22}^2 + N_2^*k_2b_{21}c_{21}^2) \\ a_4 &= N_1^*N_2^*R_1^*R_2^*\Delta\bar{\Delta}. \end{aligned} \quad (\text{B9})$$

The number of roots with positive real part is given by the number of sign changes in the sequence  $\{A_0, A_1, A_2, A_3, A_4\}$  where  $A_0 = 1$ ,  $A_1 = a_1$ ,  $A_2 = a_1(a_1a_2 - a_3)$ ,  $A_3 = (a_1a_2 - a_3)(a_1a_2a_3 - a_3^2 - a_1^2a_4)$ , and  $A_4 = a_4$ . By inspection,  $A_0$ , and  $A_1$  are positive.  $A_2$  is positive under our assumption that  $\alpha \leq 1$ .  $A_4$  has the same sign as  $\Delta\bar{\Delta}$ , which is positive since we assume  $\Delta$  and  $\bar{\Delta}$  have the same sign. Thus, the occurrence of cycles is determined by the sign of  $A_3$ : cycles arise when  $A_3$  is negative and stable coexistence occurs when  $A_3$  is positive. After collecting powers of  $\alpha$  and  $q$ , we have

$$a_1a_2a_3 - a_3^2 - a_1^2a_4 = (c_1 + c_2)\alpha^3 - c_3\alpha^2 - c_4\alpha^2q^2 - c_5\alpha^2q^{-2} + (c_6 + c_7)\alpha + c_8 \quad (\text{B10})$$

where  $c_i$  is positive for  $i \leq 5$ ;  $c_1 = O(q)$ ;  $c_2 = O(q^{-1})$ ;  $c_3, c_4, c_5$ , and  $c_8$  do not depend on  $\alpha$  or  $q$ ;  $c_6 = O(q)$ ; and  $c_7 = O(q^{-1})$ . The signs of the  $O(\alpha^2q^2)$  and  $O(\alpha^2q^{-2})$  terms in equation (B10) suggest that cycles will arise when interspecific prey competition is sufficiently high ( $\alpha$  is close to one) and sufficiently asymmetric ( $q$  is sufficiently larger or smaller than 1).

Using a Lyapunov function, we now show that stable coexistence is guaranteed if  $b_{11}/b_{21} = b_{12}/b_{22}$  and  $\alpha < 2q\sqrt{b_{11}c_{11}b_{12}c_{12}k_1k_2}/(c_{11}b_{11}k_1q^2 + c_{12}b_{12}k_2)$ .

**Theorem 2.** *If  $b_{11}/b_{21} = b_{12}/b_{22}$ , then  $P_4$  is globally Lyapunov stable when*

$$(b_{12}k_2\alpha/q + b_{11}k_1\alpha q)^2 - 4b_{12}b_{11}k_1k_2 < 0. \quad (\text{B11})$$

*Proof.* Let  $P_4 = (R_1^*, R_2^*, N_1^*, N_2^*)$ . Our Lyapunov function is

$$\begin{aligned} V(R_1, R_2, N_1, N_2) = & c_1 [R_1 - R_1^* - R_1^* \ln(R_1) + R_1^* \ln(R_1^*)] \\ & + c_2 [R_2 - R_2^* - R_2^* \ln(R_2) + R_2^* \ln(R_2^*)] \\ & + c_3 [N_1 - N_1^* - N_1^* \ln(N_1) + N_1^* \ln(N_1^*)] \\ & + c_4 [N_2 - N_2^* - N_2^* \ln(N_2) + N_2^* \ln(N_2^*)] \end{aligned} \quad (\text{B12})$$

for some constants  $c_i > 0$ . Note that  $V(R_1, R_2, N_1, N_2) \geq 0$  for all positive values of  $R_1, R_2, N_1$ , and  $N_2$  and equality holds only at  $P_4$ . Since  $dR_i/dt(P_4) = 0$  and  $dN_j/dt(P_4) = 0$ , we can write  $dV/dt$  as

$$\begin{aligned} \frac{dV}{dt} = & c_1(R_1 - R_1^*) \left[ \frac{dR_1}{dt} - \frac{dR_1}{dt}(P_4) \right] - c_2(R_2 - R_2^*) \left[ \frac{dR_2}{dt} - \frac{dR_2}{dt}(P_4) \right] \\ & - c_3(N_1 - N_1^*) \left[ \frac{dN_1}{dt} - \frac{dN_1}{dt}(P_4) \right] - c_4(N_2 - N_2^*) \left[ \frac{dN_2}{dt} - \frac{dN_2}{dt}(P_4) \right]. \end{aligned} \quad (\text{B13})$$

After algebraic manipulation we have

$$\begin{aligned} \frac{dV}{dt} = & -c_1k_1(R_1 - R_1^*)^2 - c_2k_2(R_2 - R_2^*)^2 - (c_2k_2\alpha/q + c_1k_1\alpha q)(R_1 - R_1^*)(R_2 - R_2^*) \\ & + (R_1 - R_1^*)(N_1 - N_1^*)(c_3b_{11}c_{11} - c_1c_{11}) + (R_1 - R_1^*)(N_2 - N_2^*)(c_4b_{21}c_{21} - c_1c_{21}) \\ & + (R_2 - R_2^*)(N_1 - N_1^*)(c_3b_{12}c_{12} - c_2c_{12}) + (R_2 - R_2^*)(N_2 - N_2^*)(c_4b_{22}c_{22} - c_2c_{22}) \end{aligned} \quad (\text{B14})$$

The terms in the bottom two lines are zero when the coefficients  $c_i$  satisfy

$$\frac{c_3}{c_4} = \frac{b_{11}}{b_{21}} = \frac{b_{12}}{b_{22}}, \quad c_1 = b_{11}c_3, \quad c_2 = b_{12}c_3. \quad (\text{B15})$$

Recall that we assume  $b_{11}/b_{21} = b_{12}/b_{22}$ . Setting  $c_3 = 1$  yields

$$\frac{dV}{dt} = -b_{11}k_1(R_1 - R_1^*)^2 - b_{12}k_2(R_2 - R_2^*)^2 - (b_{12}k_2\alpha/q + b_{11}k_1\alpha q)(R_1 - R_1^*)(R_2 - R_2^*)$$

We want the conditions under which  $dV/dt \leq 0$  for all positive  $R_1$  and  $R_2$ . Let  $x = (R_1 - R_1^*)$ ,  $y = (R_2 - R_2^*)$ , and  $c = b_{12}k_2\alpha/q + b_{11}k_1\alpha q$ . Then the condition  $dV/dt \leq 0$  for all positive  $R_1$  and  $R_2$  is the same as determining when the conditions on  $c$  are such that there does not exist a real solution to  $0 = b_{11}k_1x^2 + b_{12}k_2y^2 + cxy$ . Via the quadratic formula, this occurs when  $c^2 - 4b_{11}b_{12}k_1k_2 < 0$ . Substituting for  $c$  yields the result.  $\square$
